# Supplementary material
Source: PubMed Central journal article supplement (PMC2869103)
Supplement: figS1.pdf [file figS1.pdf]

## Supplement Table S1

Table S1 Comparison of kidney function in 14% and 8% LPD diet

|                                                | normal diet<br>(n=12) | 14% LPD<br>(n=6) | 8% LPD<br>(n=6) |
|------------------------------------------------|-----------------------|------------------|-----------------|
| Urine osmolality<br>(mOsm/kg H <sub>2</sub> O) | 1977 ± 293            | 1516 ± 379       | 1237 ± 328      |
| Osmolar clearance<br>(ml/day)                  | 31 ± 5                | 14 ± 2           | 16 ± 2          |
| Urea clearance<br>( $\mu$ l/min)               | 453 ± 108             | 306 ± 42         | 331 ± 42        |

## Supplement Figure S1

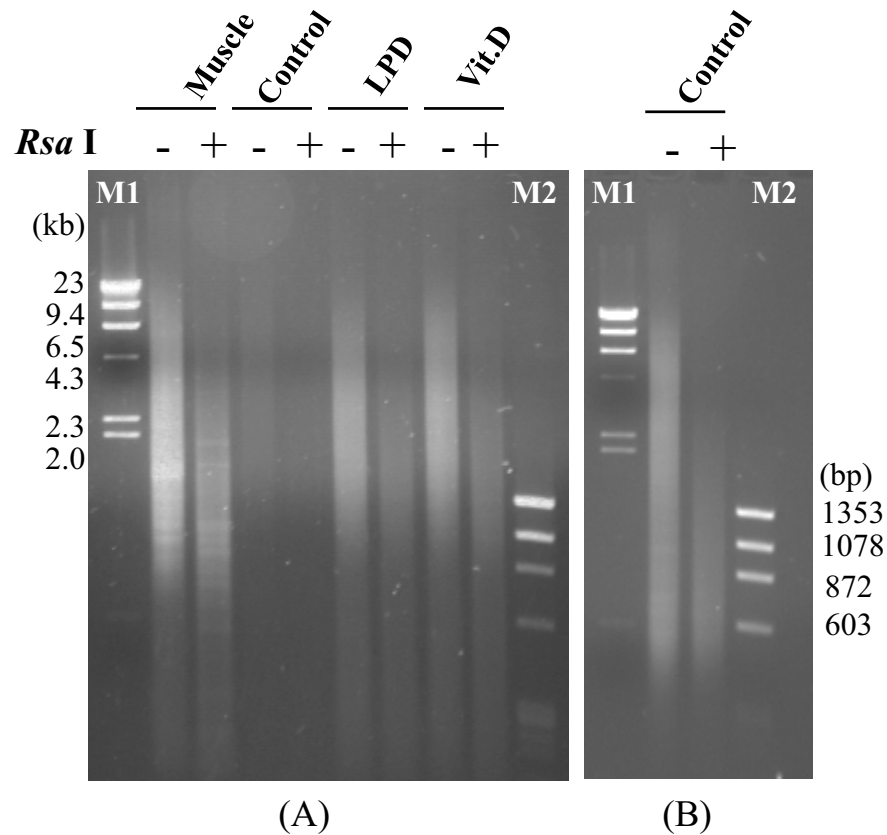

**Figure S1. Analysis of cDNA synthesis and *Rsa* I digestion.** The tester (LPD and Vit.D), driver (control), and the human skeletal muscle ds cDNA are synthesized from the poly A+ RNA as described in the Methods. The cDNA are subjected to *Rsa* I digestion to obtain shorter, blunt-ended molecules. The products are analyzed by agarose/EtBr gel electrophoresis. After *Rsa*I digestion, the average cDNA size is reduced. Since the yield of control ds cDNA is low (A). We repeated the ds cDNA synthesis and *Rsa*I digestion for control (B). M1:  $\lambda$ /HindIII DNA marker. M2:  $\Phi$ X174/Hae III DNA marker.

## Supplement Figure S2

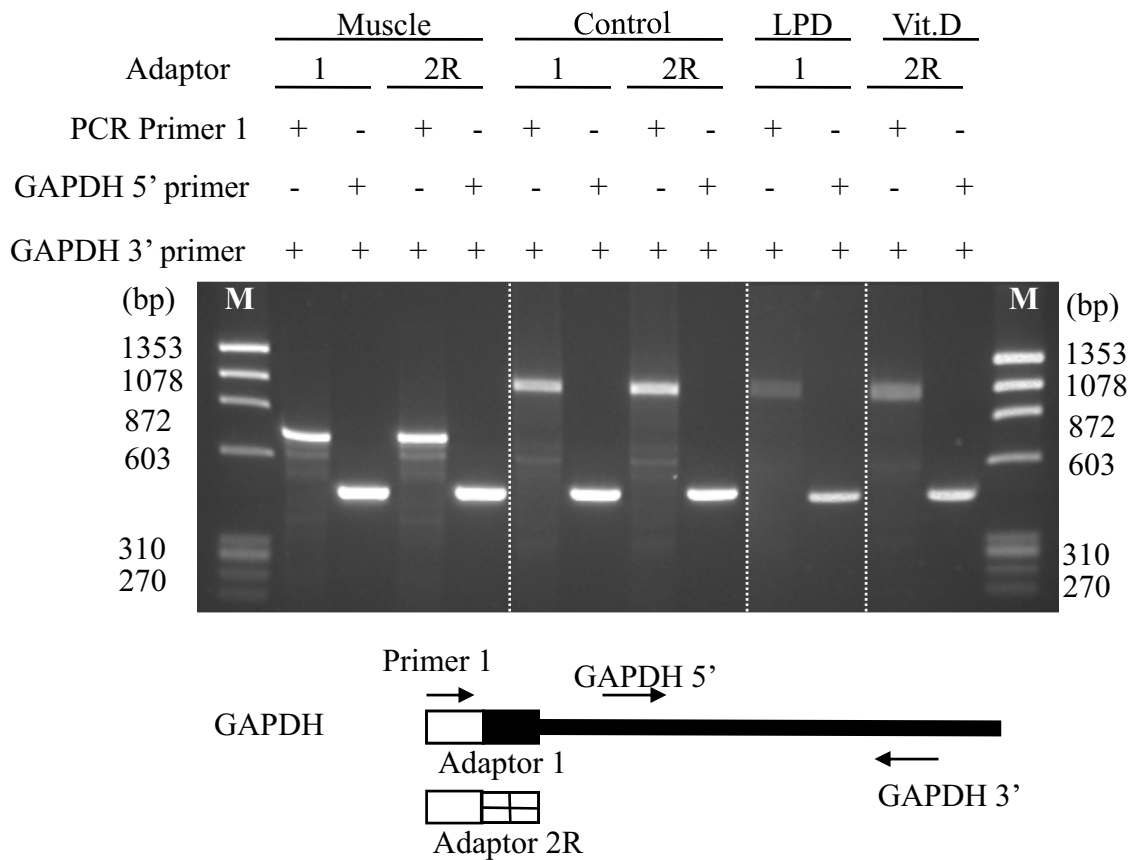

**Figure S2: Adaptor ligation efficiency analysis:** The RsaI digested cDNAs are ligated with adaptor 1 or adaptor 2R. PCR Primer 1 corresponds to 5' partial sequence of Adaptor 1 and 2R. Adapter ligated GAPDH cDNA was amplified by PCR Primer 1 and GAPDH 3' primer. GAPDH 5' and 3' primers were used as control. The PCR product amplified using PCR primer 1 and GAPDH 3' primer is 0.75 kb in the human sample and 1.2 kb in the mouse sample. M:  $\Phi$ X174/Hae III DNA marker.

# Supplement Figure S3

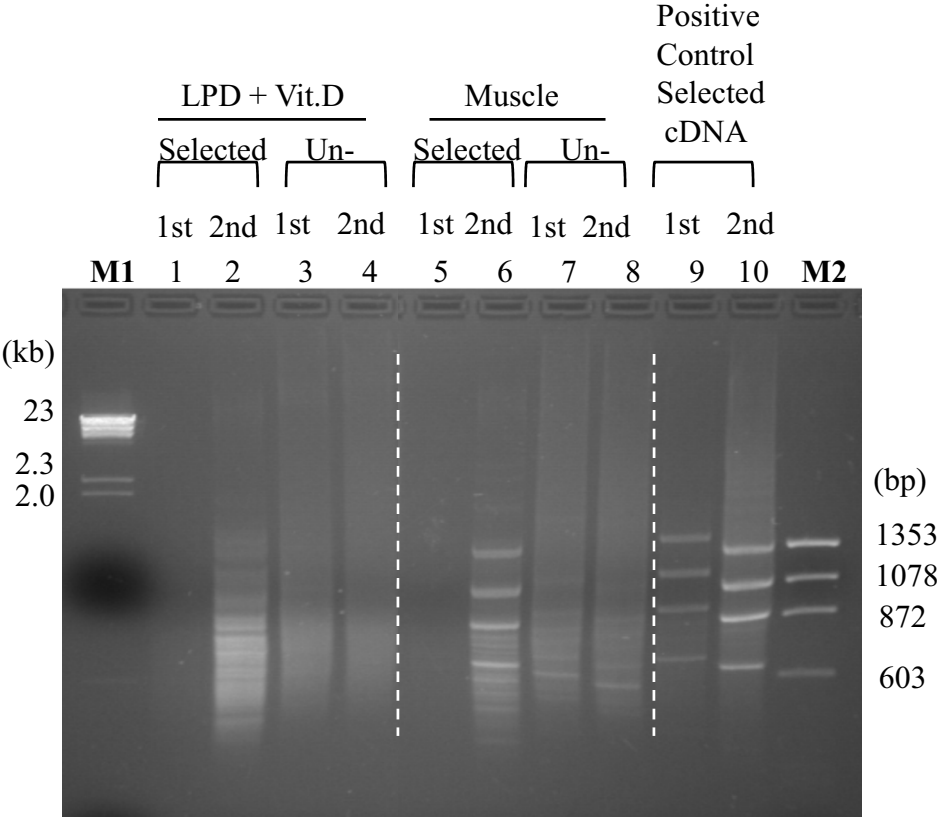

**Figure S3. Analysis of subtraction efficiency.** Human skeletal muscle mRNA sample was used as overall control for the subtraction experiment. To make mock tester cDNA, a small amount of Hae III-digested  $\Phi$ X174 DNA was added to the RsaI digested muscle cDNA. After second suppression amplification, the  $\Phi$ X174/Hae III bands were selected from the subtracted skeletal muscle control cDNA. In the unselected subtraction, the tester cDNA was ligated with both adaptor 1 and adaptor 2R. Lane 2 is the selected subtracted genes from LPD and Vit.D against control and used for generating library in TA vector. Lane 9 and Lane 10 are the positive control selected cDNA provided by Colontech. M1:  $\lambda$ /HindIII DNA marker. M2:  $\Phi$ X174/Hae III DNA marker.

## Supplement Figure S4

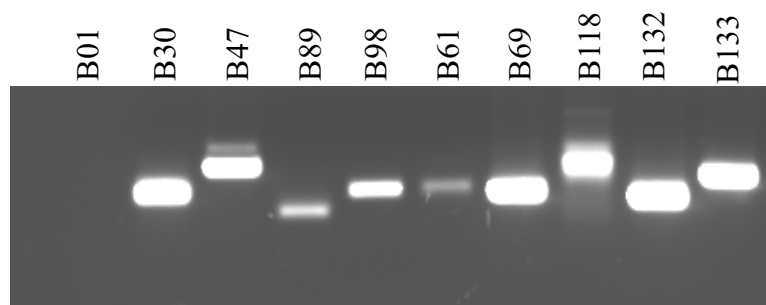

**Figure S4. RT-PCR analysis of 10 ttSSH selected transporter/channel genes.** Total RNA was extracted from rat kidney IM and reversed transcribed into cDNA . Specific primers for the 10 selected genes were designed with the Invitrogen Primer program and listed in Table S2. PCR was performed using Advantage 2 PCR kit . Amplified products were analyzed by 1.2% agarose/EtBr gel electrophoresis.

Table S2. Primers used in real-time RT-PCR

| Clone | Accession | Gene                                                 | Primer sequence                                             | Product (bp) |
|-------|-----------|------------------------------------------------------|-------------------------------------------------------------|--------------|
| B01   | XM_223625 | ABC transporter A13                                  | 5'- cagtgggtctgctcgtag-3'<br>5'- acagctgccaggagagacat-3'    | 222          |
| B30   | AB040056  | Organic cation transporter                           | 5'- ctcttgcatccttctctg -3'<br>5'- aggaaaaggtggacgttgtg -3'  | 219          |
| B47   | D13906    | Water channel AQP2                                   | 5'- ggttcccagtcagagtagc -3'<br>5'- gcggagacgagcacttttac -3' | 288          |
| B89   | XM_219555 | Two-pore channel 2                                   | 5'- tgctgctgactatccactg -3'<br>5'- tcacatcaggtgttggaa -3'   | 171          |
| B98   | NM_021688 | Potassium channel TWIK                               | 5'- gggatcacgtgttacctgct -3'<br>5'- caaaaggctcgttttcttc -3' | 223          |
| B61   | XM_213980 | ATPase, H <sup>+</sup> transporting, V1              | 5'- aagctggatgaggcaaagaa-3'<br>5'- ctgctaatcacgtgtcca -3'   | 234          |
| B69   | BC060533  | Solute carrier family 25                             | 5'- aaggagcagggtttctctc -3'<br>5'- gtggtagacgaagcagagg -3'  | 214          |
| B118  | NM_057139 | Na <sup>+</sup> H <sup>+</sup> glutamine transporter | 5'- agaaggaggaagcccagaag -3'<br>5'- tagccaattccaccactcc -3' | 277          |
| B132  | D12770    | Adenine translocator                                 | 5'- tccttctggagggttaacct -3'<br>5'- gtggtagacgaagcagagg -3' | 196          |
| B133  | XM_216510 | Vacuolar proton pump                                 | 5'- tgtccaacctgttctgtgga -3'<br>5'- gctaaggacacagctccag -3' | 262          |
